1  
2  
3  
4  
5  
6  
7  
8  
9  
10  
11  
12  
13  
14  
15  
16  
17  
18  
19  
20  
21  
22  
23  
24  
25  
26  
27  
28  
29  
30  
31  
32  
33  
34  
35

A conserved machinery underlies the synthesis of a chitosan layer in the *Candida* chlamydospore cell wall

Leo D. Bemena<sup>1</sup>, Kyunghun Min<sup>2</sup>, James B. Konopka<sup>2</sup>, and Aaron M. Neiman<sup>1\*</sup>

<sup>1</sup>Department of Biochemistry and Cell Biology, Stony Brook University, Stony Brook NY 11794-5215

<sup>2</sup>Department of Microbiology and Immunology, Stony Brook University, Stony Brook, NY 11794-5222

\*Corresponding Author  
Aaron Neiman  
Room 332 Life Sciences  
Dept. of Biochemistry and Cell Biology  
Stony Brook University  
Stony Brook, NY 11794-5215  
631-632-1543  
aaron.neiman@stonybrook.edu

Keywords: spore wall; chitin synthase; chitin deacetylase; lipid droplet; sporulation

## 36 **Abstract**

37           The polysaccharide chitosan is found in the cell wall of specific cell types in a variety of  
38 fungal species where it contributes to stress resistance, or in pathogenic fungi, virulence. Under  
39 certain growth conditions, the pathogenic yeast *Candida dubliniensis* forms a cell type termed a  
40 chlamydospore, which has an additional internal layer in its cell wall as compared to hyphal or  
41 yeast cell types. We report that this internal layer of the chlamydospore wall is rich in chitosan.  
42 The ascospore wall of *Saccharomyces cerevisiae* also has a distinct chitosan layer. As in *S.*  
43 *cerevisiae*, formation of the chitosan layer in the *C. dubliniensis* wall requires the chitin synthase  
44 *CHS3* and the chitin deacetylase *CDA2*. In addition, three lipid droplet-localized proteins Rrt8,  
45 Srt1, and Mum3, identified in *S. cerevisiae* as important for chitosan layer assembly in the  
46 ascospore wall, are required for the formation of the chitosan layer of the chlamydospore wall in  
47 *C. dubliniensis*. These results reveal that a conserved machinery is required for the synthesis of a  
48 distinct chitosan layer in the walls of these two yeasts and may be generally important for  
49 incorporation of chitosan into fungal walls.

## 50 **Importance**

51           The cell wall is the interface between the fungal cell and its environment and disruption  
52 of cell wall assembly is an effective strategy for antifungal therapies. Therefore, a detailed  
53 understanding of how cell walls form is critical to identify potential drug targets and develop  
54 therapeutic strategies. This work shows that a set of genes required for assembly of a chitosan  
55 layer in the cell wall of *S. cerevisiae* is also necessary for chitosan formation in a different cell  
56 type in a different yeast, *C. dubliniensis*. Because chitosan incorporation into the cell wall can  
57 be important for virulence, the conservation of this pathway suggests possible new targets for  
58 antifungals aimed at disrupting cell wall function.

## 59 **Introduction**

60           The cell wall is the interface between the fungal cell and the environment (1). In  
61 pathogenic fungi, the cell wall is critical for virulence as it mediates interactions with, and  
62 evasion of, the host immune system (2). Fungal cell walls are essential for viability and are a  
63 common target of antifungal drugs (3-6). Therefore, understanding the structure and assembly of  
64 the fungal wall is important for the development of antifungal therapies.

65           Fungal cell walls are composed primarily of heavily mannosylated proteins (referred to as  
66 mannan) and polysaccharides (1). In particular beta 1,3 glucans and chitin, a beta 1,4-*N*-  
67 acetylglucosamine polymer, are common structural components of fungal cell walls (1, 7, 8).  
68 Chitosan, a beta 1,4-glucosamine polymer created by deacetylation of chitin, is also found in  
69 fungal cell walls but is often limited to specific cell types or developmental stages (9-12). The  
70 presence of chitosan in cell walls can be critical for the organism. For example, in the pathogen  
71 *Cryptococcus neoformans*, chitosan in the wall dampens the host inflammatory response, and  
72 *Cryptococcus* strains unable to synthesize chitosan are avirulent (13-15). Chitosan is often found  
73 in conjunction with polyphenolic compounds, which has led to the proposal that chitosan-  
74 polyphenol complexes are a conserved architectural motif in fungal walls (16).

75           How chitosan is incorporated into the cell wall is not yet well understood. This process  
76 has been best-studied in the budding yeast, *Saccharomyces cerevisiae*, where chitosan is found  
77 uniquely in the walls of ascospores, a dormant cell type produced after meiosis by a process  
78 termed sporulation (17, 18). The ascospore wall consists of four distinct layers, named for their  
79 primary constituents, that are deposited in a sequential manner: mannan, glucan, chitosan and  
80 dityrosine (10, 19-22). The mannan and glucan layers form the inner layers of the ascospore wall  
81 and are similar in composition to layers in the vegetative cell wall (21). The outer ascospore

82 wall, containing a layer of chitosan and a layer of the polyphenol dityrosine is unique to  
83 ascospores and confers resistance against environmental insults (10, 23, 24).

84 The chitin in the vegetative cell wall of *S. cerevisiae* is produced by three different chitin  
85 synthases, Chs1, 2 and 3 (25-27). However, during sporulation chitin is produced exclusively by  
86 Chs3 (28). Chitosan is generated when acetyl groups on chitin are removed by the sporulation-  
87 specific deacetylases, Cda1 and Cda2 (11, 29). Deletion of both *CDA1* and *CDA2* results in spore  
88 walls that contain chitin, but lack the chitosan layer. In addition, while the mannan and beta-  
89 glucan layers are present, the dityrosine layer is missing. Chitosan is therefore necessary for the  
90 formation of both layers of the outer cell wall (29). In contrast, formation of the chitosan layer is  
91 independent of the formation of dityrosine. Dityrosine is synthesized from L-tyrosine in the  
92 spore cytosol by the sequential action of the Dit1 and Dit2 enzymes (30) and mutants in either  
93 *DIT1* or *DIT2* result in loss of the dityrosine without any obvious effect on the chitosan layer  
94 (23).

95 In addition to the genes directly involved in chitosan or dityrosine synthesis, several other  
96 genes are required for the formation of one or more layers of the outer spore wall (31-35). Genes  
97 of unknown function such as *MUM3* and *OSW1*, as well as the cis-prenyltransferase encoded by  
98 *SRT1*, lack both the chitosan and dityrosine layers (34). In an *srt1Δ* mutant, Chs3 activity is  
99 reduced, suggesting that Srt1 contributes to spore wall formation through regulation of Chs3  
100 (34). Srt1 is localized to a class of lipid droplets that is physically associated with the developing  
101 spore wall (34, 36). Mutants in the paralogous genes *LDS1*, *LDS2*, and *RRT8*, which encode lipid  
102 droplet-localized proteins, are specifically defective in the dityrosine layer (35). Whether the  
103 genes required for chitosan layer formation in *S. cerevisiae* are functionally conserved in other  
104 fungi has not been reported.

105           The human fungal pathogen, *Candida albicans* and its close relative, *Candida*  
106 *dubliniensis*, exhibit cell types with varying morphologies (37, 38). Though these *Candida*  
107 species are not known to produce ascospores, under certain conditions they produce a distinct,  
108 thick-walled cell type at hyphal tips termed a chlamyospore (37, 39). Chlamyospores are large  
109 round cells that are the result of mitotic divisions, unlike ascospores which package the haploid  
110 products of meiosis. The function of chlamyospores in the *Candida* life cycle is unknown.  
111 Nutrient limitation or low oxygen conditions are often required to induce the appearance of  
112 chlamyospores, and *C. dubliniensis* appears to undergo chlamyosporulation more readily than  
113 *C. albicans* (40, 41).

114           Ultrastructural studies revealed that the chlamyospore wall is more extensive than the  
115 wall of budding or hyphal *C. dubliensis* cells with an internal layer not found in those cell types  
116 (42). The structure and composition of this layer has not been well characterized. In the present  
117 study, we investigated the organization of the chlamyospore wall in *C. dubliniensis*. This work  
118 demnostrated that the unique internal layer of the chlamyospore wall is composed of chitosan.  
119 Moreover, genes encoding orthologs of *S. cerevisiae* proteins necessary for chitosan layer  
120 synthesis in ascospores are also required chlamyospore wall assembly. These results reveal that  
121 a conserved pathway underlies chitosan synthesis and incorporation in these two yeasts.

122

## 123 **Results**

### 124 ***C. dubliniensis* forms chlamyospores on solid medium containing non-fermentable carbon** 125 **sources**

126           In examining the growth of clinical isolates of *C. dubliniensis* we discovered that growth  
127 on certain carbon sources induced chlamyospore formation. While chlamyospores were not

128 observed in cultures grown on synthetic medium containing glucose or galactose, growth on N-  
129 acetyl glucosamine, glucosamine, glycerol, or acetate all led to hyphal growth and the  
130 appearance of chlamydo spores (Figure 1). Three different clinical isolates of *C. dubliniensis* as  
131 well as the established *C. dubliniensis* strain SN90 (43) displayed this behavior, whereas *C.*  
132 *albicans* did not form chlamydo spores on any of these media (K. M, unpublished obs.). Solid  
133 glycerol medium was particularly efficient at inducing chlamydo spores (no chlamydo spores  
134 were seen in liquid medium with any carbon source) (Figure 1). We took advantage of these  
135 induction conditions to examine the properties of the chlamydo spore wall in *C. dubliniensis*.

136

### 137 **The chlamydo spore wall of *C. dubliniensis* contains chitosan but not dityrosine**

138 In the *S. cerevisiae* ascospore wall, the dityrosine layer is underlain by a layer of chitosan  
139 and chitosan is found in association with polyphenol components in other fungal cell walls (9).  
140 The observation that chlamydo spore walls of *C. albicans* contain dityrosine suggested that  
141 chlamydo spore walls might contain chitosan as well (44). Chitosan can be specifically visualized  
142 using the stain Eosin Y, which has affinity for chitosan but not chitin (9, 35). When *C.*  
143 *dubliniensis* chlamydo spores were stained with Eosin Y and examined by fluorescence  
144 microscopy, bright Eosin Y-dependent fluorescence was visible at the periphery of the  
145 chlamydo spore (Figure 2A, B). The fluorescent signal was not observed on hyphal cells,  
146 consistent with the presence of chitosan specifically in the chlamydo spore wall. Similar staining  
147 of *C. albicans* chlamydo spores with Eosin Y has recently been reported (45).

148 To prove whether Eosin Y staining was specifically detecting chitosan, a genetic  
149 approach was used. The *C. dubliniensis* genome encodes one member of the chitin deacetylase  
150 enzyme family, Cda2 (Cd36\_25340), required to convert chitin to chitosan. If Eosin Y staining

151 is due to the presence of chitosan in the chlamyospore wall, this staining should be reduced or  
152 absent in a *cda2* deletion that lacks chitin deacetylase activity (9, 35).

153 *C. dubliniensis* is a diploid organism. To generate a *cda2Δ/cda2Δ* deletion strain in *C.*  
154 *dubliniensis*, we utilized a transient CRISPR-Cas9 system originally developed for *C. albicans*  
155 (46). Double strand breaks in the two *CDA2* alleles were generated by transformation with two  
156 separate linear DNA fragments encoding a Cas9 enzyme and a guide RNA specific to a sequence  
157 within *CDA2*, respectively. In addition, the transformation included a “healing fragment”  
158 comprised of the *SAT1* cassette (47) flanked by 20 bp of homology both 5’ and 3’ of the *CDA2*  
159 open reading frame. *SAT1* confers resistance to the drug, nourseothricin (NAT). By selecting for  
160 NAT resistant transformants, diploids homozygous for *cda2Δ* were obtained. Chlamyospore  
161 formation was induced in the *cda2Δ/cda2Δ* diploid on glycerol medium and examined by Eosin  
162 Y staining. No Eosin Y staining was observed, confirming the presence of chitosan in the  
163 chlamyospore wall (Figure 2B).

164 To test whether the chlamyospore wall of *C. dubliniensis* also contains dityrosine,  
165 chlamyospores were analyzed by fluorescence microscopy using a filter cube optimized for  
166 dityrosine (48). Unlike earlier reports in *C. albicans*, no fluorescence was seen specifically in  
167 the cell wall, though fluorescence was visible throughout the cytoplasm that was brighter than  
168 background fluorescence in the hyphal cells (Figure 2C). This fluorescence is not due to  
169 dityrosine, however, as deletion of the *C. dubliniensis* *DIT1* or *DIT2* genes (which are required  
170 for making dityrosine in budding yeast) also exhibited the cytoplasmic fluorescence (Figure 2C).  
171 Therefore, a common feature in chlamyospores from *C. dubliniensis* and *C. albicans* and the  
172 ascospores from budding yeast is the presence of a chitosan layer in the cell wall.

173

174 **A chitosan synthesis pathway is conserved in *C. dubliniensis***

175 *S. cerevisiae* encodes three different chitin synthases, but chitin synthase 3 (*CHS3*) is  
176 specifically used in the synthesis of the chitosan layer of the spore wall (28). *C. dubliniensis*,  
177 encodes four different predicted chitin synthases and the ORF Cd36\_12160 encodes the ortholog  
178 of *S. cerevisiae* *CHS3* (49, 50). To examine if the use of the Chs3 ortholog for chitosan synthesis  
179 is conserved, a *C. dubliniensis chs3Δ/chs3Δ* mutant was constructed and chlamyospores were  
180 stained with Eosin Y. Interestingly, as for the *cda2Δ/cda2Δ* mutant, greatly reduced fluorescence  
181 signal from the Eosin Y staining was seen in the *chs3Δ/chs3Δ* chlamyospore wall (Figure 3A).  
182 In *S. cerevisiae*, deletion of *CDA1* and *CDA2* leads to the accumulation of chitin in the ascospore  
183 wall that stains brightly with the dye Calcofluor White (CFW) (29). By contrast, in *C.*  
184 *dubliniensis*, deletion of *CDA2* or *CHS3* does not result in an increase in uniform staining around  
185 the cell wall as it does in ascospores (Figure 3A). Rather, CFW predominantly stains the septa  
186 consistent with earlier reports in *C. albicans* that chitin at the septum is deposited by chitin  
187 synthase 2 (51)(Figure 3A). In sum, these results indicate that Chs3 and Cda2, the same enzymes  
188 that generate chitosan in ascospores, collaborate to generate chitosan in the chlamyospore wall.,  
189 *C. dubliniensis* encodes uncharacterized orthologs for several of genes required for  
190 making ascospore outer cell walls. If the process of chitosan assembly in the wall is conserved,  
191 then these same genes may function in chitosan deposition into the chlamyospore wall as well.  
192 In particular, we focused on the orthologs of *S. cerevisiae* *MUM3* (Cd36\_82000), *SRT1*  
193 (Cd36\_11510), and *RRT8* (Cd36\_33980). Homozygous deletions for all three of the *C.*  
194 *dubliniensis* genes were constructed and chlamyospores of the mutant strains were examined by  
195 Eosin Y and CFW staining. Relative to wild type, the intensity of the Eosin Y fluorescence was  
196 reduced in all of the mutant strains, while the fluorescence from CFW staining was unaltered



197 (Figure 3A). These results are similar to the effects of *chs3Δ* and *cda2Δ* and suggest that these  
198 genes are important for chitosan formation in *C. dubliniensis*.

199 To more carefully assess the effect of the mutants, the fluorescence intensity of the Eosin  
200 Y staining of individual chlamyospores was categorized as bright, reduced, or absent and the  
201 number of chlamyospores in each category was scored for each strain (Figure 3B). The  
202 *cda2Δ/cda2Δ* and *chs3Δ/chs3Δ* mutant strains displayed a sharp reduction in the fraction of  
203 chlamyospores with bright fluorescence intensity and a corresponding increase in  
204 chlamyospores displaying no Eosin Y fluorescence. As expected, mutation of *DIT1* or *DIT2*  
205 had no obvious effect on Eosin Y staining. By contrast, the *mum3Δ/mum3Δ*, *srt1Δ/srt1Δ* and  
206 *rrt8Δ/rrt8Δ* diploids all showed phenotypes similar to *chs3Δ* and *cda2Δ* with a significant,  
207 though not quite as strong, reduction in brightly staining spores and an increase in unstained  
208 spores (Figure 3B).

209 To confirm that the loss of Eosin Y staining was due to the deletion alleles and not an off  
210 target effect from CRISPR/Cas9, the ability of the wild-type gene to complement each mutant  
211 was tested. Each wild-type gene was cloned into the integrating plasmid Clp10-SAT, which can  
212 be targeted to integrate into the *RPS1* locus (52). This vector uses the same *SAT1* selectable  
213 marker that was used to make the deletion alleles. Therefore, prior to transformation with the  
214 plasmids, the *SAT1* genes at both copies of each deletion had to be removed. This removal was  
215 possible because the knockout cassette included not only the *SAT1* gene but also a maltose-  
216 inducible *FLP* recombinase gene, both of which are flanked by flippase recognition target (FRT)  
217 sites (46). Induction of the *FLP* recombinase on maltose medium results in recombination  
218 between the FRT sites, thereby deleting the *SAT1* and *FLP* genes. Recombinants that lost both  
219 copies of *SAT1* were detected by identification of NAT-sensitive colonies. Introduction of *CHS3*,

220 *CDA2*, *MUM3*, or *SRT1* into the corresponding knockout strains restored Eosin Y staining to the  
221 chlamydospores, confirming that the phenotypes are caused by loss of the specific gene function  
222 (Figure 4). We were unable to do the complementation experiment for *rrt8* $\Delta$  as the deletion  
223 strain failed to grow on the maltose medium used to induce the *FLP* recombinase. Whether the  
224 maltose phenotype is a property of the *RRT8* knockout or due to some other change in the strain  
225 is unknown. In sum, these results demonstrate that *CHS3*, *CDA2*, *MUM3*, *SRT1*, and probably  
226 *RRT8* all contribute to formation of a chitosan component of the chlamydospore wall, suggesting  
227 that they constitute a conserved machinery mediating chitosan synthesis for incorporation into  
228 yeast cell walls.

229

### 230 **Ultrastructural analysis identifies a chitosan layer in the chlamydospore wall**

231 The fluorescence images from the Eosin Y staining suggest that chitosan is missing or  
232 reduced in the chlamydospore wall of various mutants. Previous ultrastructural studies have  
233 revealed that the chlamydospore wall of *C. albicans* is distinct from the hyphal wall in having a  
234 darkly staining inner layer of unidentified material underneath what appear to be beta-glucan and  
235 mannan layers (42, 53). To examine the ultrastructure of the *C. dubliniensis* chlamydospore wall,  
236 cells were stained using osmium and thiocarbohydrazide and examined by electron microscopy  
237 (31). Similar to previous reports, the cell wall of wild-type chlamydospores displayed a layer of  
238 darkly staining material close to the plasma membrane with outer, lighter layers resembling the  
239 walls of the adjacent hyphal cells (Figure 5A, B).

240 Given that the chitosan-containing outer ascospore wall of *S. cerevisiae* also stains darkly  
241 under these conditions (31), this inner, electron dense material in the chlamydospore wall may be  
242 chitosan. Consistent with this possibility and with the Eosin Y fluorescence results, this inner

243 layer was dramatically reduced in both the *chs3Δ/chs3Δ* and *cda2Δ/cda2Δ* strains (Figure 5A).  
244 Thus, as in the ascospore wall, chitosan in the chlamyospore wall forms a discrete layer. Again,  
245 consistent with the Eosin Y fluorescence results, the chitosan layer appeared reduced or absent in  
246 chlamyospores of the *mum3Δ*, *srt1Δ*, and *rrt8Δ* mutants as well (Figure 5A).

247 The reduction in the chitosan layer visible in the electron micrographs was somewhat  
248 variable between chlamyospores in individual strains. Therefore, to measure the effect of the  
249 mutants, the thickness of the chitosan layer in the micrographs was measured as an indicator of  
250 the amount of chitosan deposited. In each strain, the thickness of the chitosan layer was  
251 measured at five locations in twenty different chlamyospores (Figure 5B). All of the mutants  
252 displayed significantly reduced chitosan layers, with *chs3Δ* displaying the strongest phenotype.  
253 In sum, the ultrastructural analysis confirms that chitosan is present in a discrete layer of the  
254 chlamyospore wall and a conserved set of genes is required for proper formation of this layer.

255

### 256 ***C. dubliniensis* Rrt8, Mum3, and Srt1 are all localized on lipid droplets**

257 In *S. cerevisiae*, the Srt1 and Rrt8/Lds1/Lds2 proteins are localized to lipid-droplets, and  
258 lipid droplets are associated with the forming spore wall, suggesting some connection between  
259 lipid droplets and the assembly of the outer spore wall layers (34-36). *C. albicans*  
260 chlamyospores are reported to be rich in neutral lipids and lipid droplets based on both  
261 biochemical fractionation and staining with a lipid droplet dye (45, 54). To examine lipid  
262 droplets in *C. dubliniensis* chlamyospores, the cells were stained with the lipid droplet dye  
263 monodansylpentane (MDH) (55). This treatment revealed a very high density of lipid droplets  
264 within the chlamyospore as compared to *C. dubliniensis* cells growing in yeast phase that was  
265 not changed in any of the mutant strains (Figure 6).

266 The abundance of lipid droplets in the chlamyospore and the connection of the *S.*  
267 *cerevisiae* proteins to lipid droplets led us to examine the localization of the different *C.*  
268 *dublinsiensis* proteins. Each gene, under the control of its native promoter, was fused at its 3' end  
269 to a gene encoding a *Candida* codon-optimized red fluorescent protein (yEmRFP) (56).  
270 Plasmids containing the fusion genes were then integrated at the *RPS1* locus in the appropriate  
271 deletion strains (except for *rrt8* $\Delta$  where we were unable to eliminate the *SAT1* gene from the  
272 deletion, so a wild-type strain was used). *C. dublinsiensis* cells carrying the different yEmRFP  
273 fusions were then grown under chlamyospore-inducing conditions, stained with MDH to detect  
274 lipid droplets, and examined by fluorescence microscopy. For the *MUM3*, *SRT1*, and *RRT8*  
275 fusions, red fluorescence co-localized with the lipid droplet marker in the chlamyospores  
276 (Figure 7A). Red fluorescence at the the cell periphery was also visible in the wild-type strain  
277 carrying no yEmRFP and so is background fluorescence visible due to the longer exposures  
278 necessary to visualize the yEmRFP fusions. Importantly, no background fluorescence was seen  
279 at the lipid droplets.

280 To confirm that the fusion proteins are functional, the appropriate deletion strains  
281 carrying *MUM3::yEmRFP* or *SRT1::yEmRFP* were examined for the ability of the fusion to  
282 rescue the mutant phenotype by staining of chlamyospores with Eosin Y (Figure 7B). Both  
283 fusions restored bright Eosin Y staining indicating that the lipid droplet-localized fusion proteins  
284 are functional. The localization of all three proteins suggests that lipid droplets promote chitosan  
285 layer formation in *C. dublinsiensis*.

## 286 Discussion

287 We report that *C. dublinsiensis* efficiently forms chlamyospores when incubated on  
288 synthetic medium containing different non-fermentable carbon sources. While the molecular

289 signals that trigger chlamydosporulation are complex (40), nutritional signals are known to be  
290 involved and induction by changing carbon sources suggests that central carbon metabolism may  
291 play a role. Whether this induction mechanism is unique to *C. dubliniensis* remains to be seen,  
292 since *C. albicans* was not induced to form chlamydo spores under these conditions. Previous  
293 studies reported that *C. dubliniensis* can form chlamydo spores in Staib medium (a seed extract)  
294 (57). Wild-type *C. albicans* does not form chlamydo spores efficiently under these conditions, but  
295 deletion of the *C. albicans* *NRG1* gene leads to chlamydo sporulation in Staib medium similar to  
296 *C. dubliniensis* (41). The signals triggering chlamydo sporulation may be different in SGlycerol  
297 and Staib medium, however, as no chlamydo spores were seen on SGlycerol when a *C. albicans*  
298 *nrg1* mutant was used (L.D.B., unpublished observation).

299 To create mutant strains in *C. dubliniensis*, we utilized a transient CRISPR-Cas9 system  
300 originally developed for *C. albicans* (46). Combining this transient system with the recyclable  
301 *SAT1-FLP* cassette allowed us to do multi-step strain constructions directly in clinical isolates  
302 without the need for auxotrophic markers, greatly accelerating our analysis. That this system  
303 works well in both *C. dubliniensis* and *C. albicans* suggests that it will be useful for other  
304 *Candida* species as well.

305 In contrast to a previous report about the chlamydo spore wall of *C. albicans* (44), we see  
306 no evidence that the *C. dubliniensis* chlamydo spore wall contains dityrosine. In the earlier study,  
307 dityrosine fluorescence of the *C. albicans* chlamydo spore wall was observed in wild-type cells  
308 and deletion of the *CYP56/DIT2* gene abolished chlamydo spore formation (44). By contrast, the  
309 *C. dubliniensis* *dit2* $\Delta$  mutant formed abundant chlamydo spores (Figure 2). It is possible these  
310 results represent a difference between *C. albicans* and *C. dubliniensis*, though because the *C.*  
311 *albicans* *dit2* $\Delta$  mutant did not form chlamydo spores, it is not clear whether the fluorescence

312 observed in the wild-type *C. albicans* chlamydo spores was dityrosine or fluorescence from some  
313 other molecule.

314 We show here that chitosan is a major constituent of the previously described dark, inner  
315 layer of the *Candida* chlamydo spore wall. Chitosan also forms a discrete layer in the *S.*  
316 *cerevisiae* ascospore wall, however, the position of the chitosan layer with respect to other cell  
317 wall components is distinct in the two cell walls (Figure 8). In the ascospore, the chitosan is  
318 located towards the outside of the structure while in the chlamydo spore it is on the interior of the  
319 wall. In both cases, however, the chitosan is localized adjacent to the beta-glucan components of  
320 the wall, suggesting that the presence of the beta-glucan may also be important for organizing the  
321 chitosan into a distinct layer.

322 Our results reveal a conserved machinery required for chitosan layer synthesis. Multiple  
323 chitosan synthases are present in both *S. cerevisiae* and *C. dubliniensis* and yet in both yeasts,  
324 *CHS3* is uniquely required for synthesis of the chitosan layer of the ascospore and chlamydo spore  
325 cell walls. Whether this reflects a specific association of this chitin synthase with the chitin  
326 deacetylase protein or with some other aspect of Chs3 activity remains to be determined. For  
327 example, the Chs3 enzyme might synthesize chitin strands of a chain length or organization that  
328 is more amenable to deacetylation. Indeed, *C. albicans* Chs3 has been reported to synthesize  
329 shorter chitin fibrils than Chs8 (50).

330 The lipid-droplet localized proteins Srt1, Rrt8 and Mum3 are required for proper chitosan  
331 layer formation in both yeasts. As these proteins are localized on cytosolic lipid droplets, their  
332 effects on chitosan assembly must be somewhat indirect. *MUM3* and *SRT1* encode predicted  
333 lipid-synthesizing enzymes. The Mum3 protein is homologous to O-acyltransferase enzymes and  
334 Srt1 is a subunit of a cis-prenyltransferase responsible for synthesizing a lipid-droplet localized

335 pool of polyprenols (31, 34). In earlier work, we proposed a model in which Srt1-generated long  
336 chain polyprenols in the lipid droplet that are transferred to the plasma membrane to enhance  
337 Chs3 activity (34). It is possible that a similar mechanism occurs during chlamydospore  
338 formation. An alternative possibility was recently suggested by nuclear magnetic resonance  
339 (NMR) studies of chitosan-containing cell wall preparations from both *S. cerevisiae* and  
340 *Cryptococcus neoformans* that revealed neutral lipids are directly incorporated into the cell wall  
341 (16, 58). Thus, the Rrt8, Srt1, and Mum3 proteins may be involved in the synthesis of some lipid  
342 component that is then transferred from the lipid droplet to play a structural role during chitosan  
343 layer assembly. Further biochemical work will be necessary to clarify how these proteins and  
344 their lipid products contribute to formation of this cell wall structure.

345 NMR studies suggest that there is a common architecture for chitosan-containing  
346 elements in the fungal cell wall from ascomycetes to basidiomycetes (16). Orthologs of the genes  
347 described here that underlie formation of chitosan cell wall layers in *Candida* and  
348 *Saccharomyces* can be found throughout the fungi. Thus, the similar architecture may reflect a  
349 broadly conserved genetic network regulating the synthesis of chitosan-containing cell wall  
350 structures in fungi. Given the importance of chitosan to virulence of some pathogenic fungi, the  
351 genes described here may be useful potential targets for antifungal therapies (13).

352

## 353 **Materials and methods**

### 354 **Strain and growth conditions**

355 Strain used are listed in Table 1. *C. dubliniensis* strain Cd1465 is derived from a clinical  
356 specimen isolated from a patient sample at the Stony Brook hospital. This strain was routinely  
357 cultured at 30°C on YPD medium (2% Bacto peptone, 2% dextrose, 1% yeast extract and 2%

358 agar). *C. dubliniensis* transformants were selected on YPD\_NAT (2% Bacto peptone, 2%  
359 dextrose, 1% yeast extract, 2% agar and 400µg/ml nourseothricin [Werner BioAgents]) for  
360 nourseothricin-resistant isolates. Synthetic glycerol (SGlycerol) solid medium (1.7% yeast  
361 nitrogen base without amino acids, 2% agar and 0.1M glycerol) was used to induce  
362 chlamydo spores, as described below.

363

### 364 **Induction of chlamydo spores**

365 To induce chlamydo spores formation, wild-type and mutant strains were inoculated in 5ml YPD  
366 liquid and were incubated at 30°C with shaking at 220rpm for overnight. A suspension of  $1 \times$   
367  $10^7$  cells/ml was prepared from the overnight culture. The cell suspension was then diluted 100  
368 times and 1ml was spread on a SGlycerol plate. Excess liquid was removed by pipetting and the  
369 plates were left to dry at room temperature. All the plates were incubated in 30°C for 24h. The  
370 chlamydo spores were collected by adding 500µl of distilled water to the plate and gently  
371 scraping the surface of the plate with a glass rod.

372

### 373 **CRISPR-Cas9 mutagenesis in *C. dubliniensis***

374 To create knockout mutations in *C. dubliniensis*, we adapted a CRISPR/CAS9 system developed  
375 for *C. albicans* (59). The pV1093 vector carries both Cas9 and single guide RNA (sgRNA)  
376 expression cassettes (59). Guide RNAs targeting specific genes were designed using the CCTop  
377 (CRISPR/Cas9 target online) program (60). The *CAS9* gene expression cassette and the sgRNA  
378 scaffold were amplified separately from pV1093 using the primers BLD1 and BLD2. The  
379 sgRNA scaffold contains the *SNR52* promoter was assembled by the single-joint PCR method  
380 (61). Briefly, three-DNA synthesis step was used to generate the sgRNA cassette. The first step



381 consists to amplify by PCR the *SNR52* promoter and sgRNA scaffold using gene-specific  
382 flanking primers (Table 2) and internal chimeric primers (BLD3 and BLD4). Twenty  
383 complementary bases overlapped and specified the sgRNA of each gene to be knocked out. The  
384 second step, both components were fused by primer extension, relying upon annealing of the  
385 complementary chimeric primer extensions. The third step consists to amplify the joined product  
386 with nested primers (BLD5 and BLD6) to yield the sgRNA cassette.

387 The FLP recombination target sequence target (FRT) and the *SAT1* cassette both encoded in  
388 pGR\_NAT vector, were flanked by ~20 bp homology to the 5' and 3' regions of the gene to be  
389 knocked out. This fragment was PCR amplified and used as the gene deletion construct (46). The  
390 oligonucleotides used in this study are listed in Table 2. PCR amplification were conducted using  
391 Ex *Taq* in accordance with the manufacturer's instructions (TaKaRa Bio, Inc.).

392 For the mutagenesis, PCR products for transformation were purified and concentrated with a  
393 commercial PCR purification kit (Qiagen, Maryland, USA). The deletion constructs (3µg) were  
394 co-transformed with the CdcAS9 cassette (1µg) and the sgRNA cassette (1µg) using the lithium  
395 acetate transformation method (62). At least five independent homozygous deletion strains were  
396 tested for each mutant.

397

### 398 **Rescue of mutant strains**

399 For each mutant, to confirm that the observed phenotypes were due to the deletion, an integrating  
400 plasmid carrying the wild type gene was constructed. CIp10-SAT (a gift of N. Dean) was used as  
401 the vector. To construct the complementing plasmids, CIp10 was amplified as two separate  
402 fragments by PCR. The first fragment, amplified with BLD121 and OKZ67, contains the *Apal*  
403 site at the one end and part of the Amp locus at the other end. The second fragment, amplified

404 with BLD123 and OKZ68, harbors an overlapping fragment of the Amp locus at one end and an  
405 *XhoI* site at the other end. Each gene of interest was amplified by PCR from *C. dubliniensis*  
406 genomic DNA with 15bp homologous sequence to the region of CIP10 carrying the *ApaI* or *XhoI*  
407 sites at the opposite ends. *CDA2* was amplified with BLD104 and BLD105, *CHS3* with BLD97  
408 and BLD11, *MUM3* with BLD112 and BLD113, and *SRT1* with BLD116 and BLD117. The  
409 three fragments were fused by Gibson Assembly (BioLabs) and transformed into *E. coli*. All the  
410 plasmids used in this study are listed in Table 3.

411 In order to rescue the mutant strains, we first recycled the selectable marker *SAT1*. To allow the  
412 recycling, the mutant strains were plated on YPM [2% Bacto peptone, 2% maltose, 1% yeast  
413 extract, 2% agar] to induce expression of the FLP recombinase (47) and then replica-plated to  
414 YPD\_NAT medium. Colonies that became sensitive to nourseothricin were selected for  
415 transformation with the integrating plasmid carrying the corresponding wild type gene. The  
416 plasmids were linearized by digestion with *NcoI* before transformation into the mutant strains by  
417 lithium acetate transformation method (62) with modifications. Briefly, fresh overnight cultures  
418 (12 h to 16 h) were diluted 1:50 and incubated for ~ 6 h (optical density at 600 nm [OD<sub>600</sub>] of  
419 5.0. The cells were harvested, washed once with H<sub>2</sub>O and once with 100 mM lithium acetate  
420 (LiOAc), and resuspended in 100 µl LiOAc (100 mM). Set the following transformation mixture  
421 of 240 µl polyethylene glycol (50%), 32 µl LiOAc (1M), 33 µl linearized plasmid (~ 30µg)  
422 and 5 µl ssDNA, in which the 100 µl of cell suspension were added. The mixture tube was  
423 incubated for overnight at 30°C. The next day, the tube was heat shocked at 44°C for 15 minutes.  
424 The cells were harvested and washed with YPD and then resuspended in 1ml. The suspension  
425 was incubated at 30°C with shaking for 6 h. After the incubation time, the cells were harvested

426 and spread on YPD\_NAT plates. The plates were incubated at 30°C and colonies were visible  
427 after 2 days.

428

#### 429 **Localization of Cda2, Mum3, Rrt8 and Srt1**

430 To localize the proteins of interest, plasmids were constructed by creating fusion genes that  
431 express C-terminal fusions to yEmRFP. First, the CIP10 vector was digested with *KpnI* and  
432 *XhoI*. Next, the gene of interest was amplified without the stop codon, using genomic DNA  
433 obtained from strain Cd1465. The yEmRFP fragment was amplified by PCR using yEpGAP-  
434 Cherry vector (56) as template. As describe above, the three fragments were fused by Gibson  
435 assembly. The plasmids were linearized by digestion with *NcoI* and transformed into the  
436 nourseothricin-sensitive mutants by lithium acetate transformation method.

437

#### 438 **Calcofluor white (CFW)/Eosin Y staining**

439 Chlamydo spores were collected and washed with 1 ml McIlvaine's buffer (0.2 M Na<sub>2</sub>HPO<sub>4</sub>/0.1  
440 M citric acid [pH 6.0]) followed by staining with 30 µl Eosin Y disodium salt (Sigma) (5 mg/ml)  
441 in 500 µl McIlvaine's buffer for 10 min at room temperature in the dark. Chlamydo spores were  
442 then washed twice in McIlvaine's buffer to remove residual dye and resuspended in 200 µl  
443 McIlvaine's buffer. One microliter of a 1 mg/ml Calcofluor White solution (Sigma) was then  
444 added to the Eosin Y-stained cells before transfer to microscope slides. Fluorescence of  
445 Calcofluor White and Eosin Y stains was examined using DAPI and FITC filter sets,  
446 respectively.

447

#### 448 **MDH staining of lipid droplets**

449 To stain LDs in chlamyospore with monodansylpentane (MDH) (Abgent), chlamyospores  
450 collected as described above were washed once with 1X PBS followed by incubation in 1ml of  
451 PBS containing 100mM of MDH for 15 min in 37°C. Chlamyospores were then washed twice  
452 with 1X PBS and examined by fluorescence microscopy using a BFP optimized filter set to  
453 visualize MDH fluorescence.

454

#### 455 **Microscopy**

456 All images were collected on a Zeiss Axio-Imager microscope using a Hamamatsu ER-G camera  
457 and Zen 3.0 software.

458

#### 459 **Transmission electron microscopy**

460 Chlamyospores were collected as described above and stained for electron microscopy using  
461 the osmium and thiocarbohydrazide staining as described previously(31). Briefly,  
462 chlamyospores were fixed by resuspension in 3% glutaraldehyde in cacodylate buffer, for 1 hr,  
463 washed once in 0.1M cacodylate buffer (pH 7.4), and then resuspended in 1% osmium tetroxide  
464 and 1% potassium ferricyanide in cacodylate buffer for 30 min at room temperature.

465 Chlamyospores were then washed four times in dH<sub>2</sub>O, resuspended in 1% thiocarbohydrazide  
466 in water, and incubated for 5min at room temperature followed by one wash in dH<sub>2</sub>O and an  
467 additional 5 min incubation in 1% osmium tetroxide and 1% potassium ferricyanide.. The  
468 chlamyospores were then incubated in saturated uranyl acetate for 2h and dehydrated through a  
469 graded series of acetone washes. The dehydrated samples were then treated with 100% propylene  
470 oxide for 10 minutes, embedded in Epon 812, sectioned, and images were collected on an FEI  
471 BioTwin microscope at 80 kV.

472

473 **Statistics**

474 Data presented are the mean  $\pm$  SE of indicated numbers of independent samples. Statistical  
475 significance was determined with Student's *t*-test (two-tail, heteroscedastic) using Microsoft  
476 Excel software. Differences between the analyzed samples were considered significant at  $p <$   
477 0.05.

478

479 **Acknowledgements**

480 The authors wish to thank Neta Dean for reagents and advice, members of the Konopka  
481 and Neiman labs for helpful discussions, and Nancy Hollingsworth for comments on the  
482 manuscript. This work was supported by NIH Grant GM072854 to A.M.N. and NIH Grants  
483 R01GM116048 and R01AI047837 to J.B.K.

484

485

486 **References**

- 487 1. Free SJ. 2013. Fungal cell wall organization and biosynthesis. *Adv Genet* 81:33-82.
- 488 2. Garcia-Rubio R, de Oliveira HC, Rivera J, Trevijano-Contador N. 2019. The Fungal Cell  
489 Wall: *Candida*, *Cryptococcus*, and *Aspergillus* Species. *Front Microbiol* 10:2993.
- 490 3. Cortes JCG, Curto MA, Carvalho VSD, Perez P, Ribas JC. 2019. The fungal cell wall as  
491 a target for the development of new antifungal therapies. *Biotechnol Adv*  
492 doi:10.1016/j.biotechadv.2019.02.008.
- 493 4. Denning DW. 2003. Echinocandin antifungal drugs. *Lancet* 362:1142-51.
- 494 5. Georgopapadakou NH, Tkacz JS. 1995. The fungal cell wall as a drug target. *Trends*  
495 *Microbiol* 3:98-104.
- 496 6. Selitrennikoff CP, Nakata M. 2003. New cell wall targets for antifungal drugs. *Curr Opin*  
497 *Investig Drugs* 4:200-5.
- 498 7. Brown HE, Esher SK, Alspaugh JA. 2020. Chitin: A "Hidden Figure" in the Fungal Cell  
499 Wall. *Curr Top Microbiol Immunol* 425:83-111.
- 500 8. Kollar R, Reinhold BB, Petrakova E, Yeh HJ, Ashwell G, Drgonova J, Kapteyn JC, Klis  
501 FM, Cabib E. 1997. Architecture of the yeast cell wall. Beta(1-->6)-glucan interconnects  
502 mannoprotein, beta(1-->3)-glucan, and chitin. *J Biol Chem* 272:17762-17775.
- 503 9. Baker LG, Specht CA, Donlin MJ, Lodge JK. 2007. Chitosan, the deacetylated form of  
504 chitin, is necessary for cell wall integrity in *Cryptococcus neoformans*. *Eukaryot Cell*  
505 6:855-67.
- 506 10. Briza P, Ellinger A, Winkler G, Breitenbach M. 1988. Chemical composition of the yeast  
507 ascospore wall. The second outer layer consists of chitosan. *J Biol Chem* 263:11569-  
508 11574.

- 509 11. Christodoulidou A, Bouriotis V, Thireos G. 1996. Two sporulation-specific chitin  
510 deacetylase-encoding genes are required for the ascospore wall rigidity of *Saccharomyces*  
511 *cerevisiae*. J Biol Chem 271:31420-31425.
- 512 12. Matsuo Y, Tanaka K, Matsuda H, Kawamukai M. 2005. *cdal+*, encoding chitin  
513 deacetylase is required for proper spore formation in *Schizosaccharomyces pombe*. FEBS  
514 Lett 579:2737-43.
- 515 13. Baker LG, Specht CA, Lodge JK. 2011. Cell wall chitosan is necessary for virulence in  
516 the opportunistic pathogen *Cryptococcus neoformans*. Eukaryot Cell 10:1264-1268.
- 517 14. Hole CR, Lam WC, Upadhy R, Lodge JK. 2020. *Cryptococcus neoformans* Chitin  
518 Synthase 3 Plays a Critical Role in Dampening Host Inflammatory Responses. mBio  
519 11:e03373.
- 520 15. Lam WC, Upadhy R, Specht CA, Ragsdale AE, Hole CR, Levitz SM, Lodge JK. 2019.  
521 Chitosan Biosynthesis and Virulence in the Human Fungal Pathogen *Cryptococcus gattii*.  
522 mSphere 4:e00644.
- 523 16. Chrissian C, Lin CP, Camacho E, Casadevall A, Neiman AM, Stark RE. 2020.  
524 Unconventional Constituents and Shared Molecular Architecture of the Melanized Cell  
525 Wall of *C. neoformans* and Spore Wall of *S. cerevisiae*. J Fungi (Basel) 6:329.
- 526 17. Neiman AM. 2005. Ascospore formation in the yeast *Saccharomyces cerevisiae*.  
527 Microbiol Mol Biol Rev 69:565-584.
- 528 18. Neiman AM. 2011. Sporulation in the budding yeast *Saccharomyces cerevisiae*. Genetics  
529 189:737-765.

- 530 19. Briza P, Ellinger A, Winkler G, Breitenbach M. 1990. Characterization of a DL-  
531 dityrosine-containing macromolecule from yeast ascospore walls. *J Biol Chem*  
532 265:15118-15123.
- 533 20. Ishihara S, Hirata A, Nogami S, Beauvais A, Latge JP, Ohya Y. 2007. Homologous  
534 subunits of 1,3-beta-glucan synthase are important for spore wall assembly in  
535 *Saccharomyces cerevisiae*. *Eukaryot Cell* 6:143-156.
- 536 21. Lynn RR, Magee PT. 1970. Development of the spore wall during ascospore formation in  
537 *Saccharomyces cerevisiae*. *J Cell Biol* 44:688-692.
- 538 22. Tachikawa H, Bloecher A, Tatchell K, Neiman AM. 2001. A Gip1p-Glc7p phosphatase  
539 complex regulates septin organization and spore wall formation. *J Cell Biol* 155:797-808.
- 540 23. Briza P, Breitenbach M, Ellinger A, Segall J. 1990. Isolation of two developmentally  
541 regulated genes involved in spore wall maturation in *Saccharomyces cerevisiae*. *Genes*  
542 *Dev* 4:1775-1789.
- 543 24. Whelan WL, Ballou CE. 1975. Sporulation in D-glucosamine auxotrophs of  
544 *Saccharomyces cerevisiae*: meiosis with defective ascospore wall formation. *J Bacteriol*  
545 124:1545-1557.
- 546 25. Orlean P. 2012. Architecture and biosynthesis of the *Saccharomyces cerevisiae* cell wall.  
547 *Genetics* 192:775-818.
- 548 26. Shaw JA, Mol PC, Bowers B, Silverman SJ, Valdivieso MH, Duran A, Cabib E. 1991.  
549 The function of chitin synthases 2 and 3 in the *Saccharomyces cerevisiae* cell cycle. *J*  
550 *Cell Biol* 114:111-23.
- 551 27. Silverman SJ. 1989. Similar and different domains of chitin synthases 1 and 2 of *S.*  
552 *cerevisiae*: two isozymes with distinct functions. *Yeast* 5:459-467.



- 553 28. Pammer M, Briza P, Ellinger A, Schuster T, Stucka R, Feldmann H, Breitenbach M.  
554 1992. *DIT101* (*CSD2*, *CALI*), a cell cycle-regulated yeast gene required for synthesis of  
555 chitin in cell walls and chitosan in spore walls. *Yeast* 8:1089-1099.
- 556 29. Christodoulidou A, Briza P, Ellinger A, Bouriotis V. 1999. Yeast ascospore wall  
557 assembly requires two chitin deacetylase isozymes. *FEBS Lett* 460:275-279.
- 558 30. Briza P, Eckerstorfer M, Breitenbach M. 1994. The sporulation-specific enzymes  
559 encoded by the *DIT1* and *DIT2* genes catalyze a two-step reaction leading to a soluble  
560 LL-dityrosine-containing precursor of the yeast spore wall. *Proc Natl Acad Sci U S A*  
561 91:4524-4528.
- 562 31. Coluccio A, Bogengruber E, Conrad MN, Dresser ME, Briza P, Neiman AM. 2004.  
563 Morphogenetic pathway of spore wall assembly in *Saccharomyces cerevisiae*. *Eukaryot*  
564 *Cell* 3:1464-1475.
- 565 32. Felder T, Bogengruber E, Tenreiro S, Ellinger A, Sa-Correia I, Briza P. 2002. Dtrlp, a  
566 multidrug resistance transporter of the major facilitator superfamily, plays an essential  
567 role in spore wall maturation in *Saccharomyces cerevisiae*. *Eukaryot Cell* 1:799-810.
- 568 33. Gomez-Esquer F, Rodriguez-Pena JM, Diaz G, Rodriguez E, Briza P, Nombela C,  
569 Arroyo J. 2004. *CRR1*, a gene encoding a putative transglycosidase, is required for proper  
570 spore wall assembly in *Saccharomyces cerevisiae*. *Microbiology* 150:3269-3280.
- 571 34. Hoffman R, Grabinska K, Guan Z, Sessa WC, Neiman AM. 2017. Long-Chain  
572 Polyprenols Promote Spore Wall Formation in *Saccharomyces cerevisiae*. *Genetics*  
573 doi:10.1534/genetics.117.300322.
- 574 35. Lin CP, Kim C, Smith SO, Neiman AM. 2013. A highly redundant gene network controls  
575 assembly of the outer spore wall in *S. cerevisiae*. *PLoS Genet* 9:e1003700.

- 576 36. Ren J, Pei-Chen Lin C, Pathak MC, Temple BR, Nile AH, Mousley CJ, Duncan MC,  
577 Eckert DM, Leiker TJ, Ivanova PT, Myers DS, Murphy RC, Brown HA, Verdaasdonk J,  
578 Bloom KS, Ortlund EA, Neiman AM, Bankaitis VA. 2014. A phosphatidylinositol  
579 transfer protein integrates phosphoinositide signaling with lipid droplet metabolism to  
580 regulate a developmental program of nutrient stress-induced membrane biogenesis. *Mol*  
581 *Biol Cell* 25:712-27.
- 582 37. Staib P, Morschhauser J. 2007. Chlamyospore formation in *Candida albicans* and  
583 *Candida dubliniensis*--an enigmatic developmental programme. *Mycoses* 50:1-12.
- 584 38. Sudbery P, Gow N, Berman J. 2004. The distinct morphogenic states of *Candida*  
585 *albicans*. *Trends Microbiol* 12:317-24.
- 586 39. Martin SW, Douglas LM, Konopka JB. 2005. Cell cycle dynamics and quorum sensing in  
587 *Candida albicans* chlamydozoospores are distinct from budding and hyphal growth.  
588 *Eukaryot Cell* 4:1191-202.
- 589 40. Bottcher B, Pollath C, Staib P, Hube B, Brunke S. 2016. *Candida* species Rewired  
590 Hyphae Developmental Programs for Chlamydozoospore Formation. *Front Microbiol*  
591 7:1697.
- 592 41. Staib P, Morschhauser J. 2005. Differential expression of the *NRG1* repressor controls  
593 species-specific regulation of chlamydozoospore development in *Candida albicans* and  
594 *Candida dubliniensis*. *Mol Microbiol* 55:637-52.
- 595 42. Jansons VK, Nickerson WJ. 1970. Induction, morphogenesis, and germination of the  
596 chlamydozoospore of *Candida albicans*. *J Bacteriol* 104:910-21.
- 597 43. Staib P, Morschhauser J. 1999. Chlamydozoospore formation on Staib agar as a species-  
598 specific characteristic of *Candida dubliniensis*. *Mycoses* 42:521-4.

- 599 44. Melo NR, Moran GP, Warrilow AG, Dudley E, Smith SN, Sullivan DJ, Lamb DC, Kelly  
600 DE, Coleman DC, Kelly SL. 2008. CYP56 (Dit2p) in *Candida albicans*: characterization  
601 and investigation of its role in growth and antifungal drug susceptibility. *Antimicrob*  
602 *Agents Chemother* 52:3718-3724.
- 603 45. Hernandez-Cervantes A, Znaidi S, van Wijlick L, Denega I, Basso V, Ropars J, Sertour  
604 N, Sullivan D, Moran G, Basmaciyan L, Bon F, Dalle F, Bougnoux ME, Boekhout T,  
605 Yang Y, Li Z, Bachellier-Bassi S, d'Enfert C. 2020. A conserved regulator controls  
606 asexual sporulation in the fungal pathogen *Candida albicans*. *Nat Commun* 11:6224.
- 607 46. Min K, Ichikawa Y, Woolford CA, Mitchell AP. 2016. *Candida albicans* Gene Deletion  
608 with a Transient CRISPR-Cas9 System. *mSphere* 1:e00130-16.
- 609 47. Reuss O, Vik A, Kolter R, Morschhauser J. 2004. The *SATI* flipper, an optimized tool for  
610 gene disruption in *Candida albicans*. *Gene* 341:119-27.
- 611 48. Suda Y, Rodriguez RK, Coluccio AE, Neiman AM. 2009. A screen for spore wall  
612 permeability mutants identifies a secreted protease required for proper spore wall  
613 assembly. *PLoS One* 4:e7184.
- 614 49. Henar Valdivieso M, Duran A, Roncero C. 1999. Chitin synthases in yeast and fungi.  
615 *EXS* 87:55-69.
- 616 50. Lenardon MD, Whitton RK, Munro CA, Marshall D, Gow NA. 2007. Individual chitin  
617 synthase enzymes synthesize microfibrils of differing structure at specific locations in the  
618 *Candida albicans* cell wall. *Mol Microbiol* 66:1164-73.
- 619 51. Mio T, Yabe T, Sudoh M, Satoh Y, Nakajima T, Arisawa M, Yamada-Okabe H. 1996.  
620 Role of three chitin synthase genes in the growth of *Candida albicans*. *J Bacteriol*  
621 178:2416-9.

- 622 52. Murad AM, Lee PR, Broadbent ID, Barelle CJ, Brown AJ. 2000. CIp10, an efficient and  
623 convenient integrating vector for *Candida albicans*. *Yeast* 16:325-7.
- 624 53. Shannon JL. 1981. Scanning and transmission electron microscopy of *Candida albicans*  
625 chlamydospores. *Journal of General Microbiology* 125:199-203.
- 626 54. Jansons VK, Nickerson WJ. 1970. Chemical composition of chlamydospores of *Candida*  
627 *albicans*. *J Bacteriol* 104:922-32.
- 628 55. Currie E, Guo X, Christiano R, Chitraju C, Kory N, Harrison K, Haas J, Walther TC,  
629 Farese RV, Jr. 2014. High confidence proteomic analysis of yeast LDs identifies  
630 additional droplet proteins and reveals connections to dolichol synthesis and sterol  
631 acetylation. *J Lipid Res* 55:1465-77.
- 632 56. Keppler-Ross S, Noffz C, Dean N. 2008. A new purple fluorescent color marker for  
633 genetic studies in *Saccharomyces cerevisiae* and *Candida albicans*. *Genetics* 179:705-10.
- 634 57. Palige K, Linde J, Martin R, Bottcher B, Citiulo F, Sullivan DJ, Weber J, Staib C, Rupp  
635 S, Hube B, Morschhauser J, Staib P. 2013. Global transcriptome sequencing identifies  
636 chlamydospore specific markers in *Candida albicans* and *Candida dubliniensis*. *PLoS*  
637 *One* 8:e61940.
- 638 58. Chrissian C, Camacho E, Kelly JE, Wang H, Casadevall A, Stark RE. 2020. Solid-state  
639 NMR spectroscopy identifies three classes of lipids in *Cryptococcus neoformans*  
640 melanized cell walls and whole fungal cells. *J Biol Chem* 295:15083-15096.
- 641 59. Vyas VK, Barrasa MI, Fink GR. 2015. A *Candida albicans* CRISPR system permits  
642 genetic engineering of essential genes and gene families. *Sci Adv* 1:e1500248.

- 643 60. Stemmer M, Thumberger T, Del Sol Keyer M, Wittbrodt J, Mateo JL. 2015. CCTop: An  
644 Intuitive, Flexible and Reliable CRISPR/Cas9 Target Prediction Tool. PLoS One  
645 10:e0124633.
- 646 61. Yu JH, Hamari Z, Han KH, Seo JA, Reyes-Dominguez Y, Scazzocchio C. 2004. Double-  
647 joint PCR: a PCR-based molecular tool for gene manipulations in filamentous fungi.  
648 Fungal Genet Biol 41:973-81.
- 649 62. Walther A, Wendland J. 2003. An improved transformation protocol for the human  
650 fungal pathogen *Candida albicans*. Curr Genet 42:339-43.
- 651

652 Table 1. Strains used in this study

| Strain | Genotype                                                                                    | Reference  |
|--------|---------------------------------------------------------------------------------------------|------------|
| Cd1465 | Wild-type                                                                                   | This study |
| Cd1466 | Wild-type                                                                                   | This study |
| Cd1467 | Wild-type                                                                                   | This study |
| BEM7   | Cd1465, plus <i>cda2Δ::FRT-SAT1::FLIP-FRT /cda2Δ:: FRT-SAT1::FLIP-FRT</i>                   | This study |
| BEM8   | Cd1465, plus <i>chs3Δ:: FRT-SAT1::FLIP-FRT /chs3Δ:: FRT-SAT1::FLIP-FRT</i>                  | This study |
| BEM9   | Cd1465, plus <i>dit1Δ:: FRT-SAT1::FLIP-FRT /dit1Δ:: FRT-SAT1::FLIP-FRT</i>                  | This study |
| BEM10  | Cd1465, plus <i>dit2Δ:: FRT-SAT1::FLIP-FRT /dit2Δ:: FRT-SAT1::FLIP-FRT</i>                  | This study |
| BEM11  | Cd1465, plus <i>mum3Δ:: FRT-SAT1::FLIP-FRT /mum3Δ::FRT-SAT1::FLIP-FRT</i>                   | This study |
| BEM13  | Cd1465, plus <i>rrt8Δ:: FRT-SAT1::FLIP-FRT /rrt8Δ:: FRT-SAT1::FLIP-FRT</i>                  | This study |
| BEM14  | Cd1465, plus <i>srt1Δ:: FRT-SAT1::FLIP-FRT /srt1Δ:: FRT-SAT1::FLIP-FRT</i>                  | This study |
| BEM15  | Cd1465, plus <i>cda2Δ::FRT/cda2Δ::FRT RPS1::P<sub>CDA2</sub>CDA2-CIp10-SAT1/RPS1</i>        | This study |
| BEM16  | Cd1465, plus <i>chs3Δ::FRT/chs3Δ::FRT RPS1::P<sub>CHS3</sub>CHS3-CIp10-SAT1/RPS1</i>        | This study |
| BEM17  | Cd1465, plus <i>mum3Δ::FRT/mum3Δ::FRT RPS1::P<sub>MUM3</sub>MUM3-CIp10-SAT1/RPS1</i>        | This study |
| BEM18  | Cd1465, plus <i>srt1Δ::FRT/srt1Δ::FRT RPS1::P<sub>SRT1</sub>SRT1-CIp10-SAT1/RPS1</i>        | This study |
| BEM19  | Cd1465, plus <i>cda2Δ::FRT/cda2Δ::FRT RPS1::P<sub>CDA2</sub>CDA2-yEmRFP-CIp10-SAT1/RPS1</i> | This study |
| BEM20  | Cd1465, plus <i>mum3Δ::FRT/mum3Δ::FRT RPS1::P<sub>MUM3</sub>MUM3-yEmRFP-CIp10-SAT1/RPS1</i> | This study |
| BEM21  | Cd1465, plus <i>RPS1::P<sub>RRT8</sub>RRT8-yEmRFP-CIp10-SAT1/RPS1</i>                       | This study |
| BEM22  | Cd1465, plus <i>srt1Δ::FRT/srt1Δ::FRT RPS1::P<sub>SRT1</sub>SRT1-yEmRFP-CIp10-SAT1/RPS1</i> | This study |

653

654

655

656

657 Table 2. Oligonucleotide primers used in this study

| Name  | Key feature                                 | Sequence                                                                                                   |
|-------|---------------------------------------------|------------------------------------------------------------------------------------------------------------|
| BLD1  | CaCas9 forward                              | ATCTCATTAGATTGGAACCTGTGGGTT                                                                                |
| BLD2  | CaCas9 reverse                              | TTCGAGCGTCCCAAACCTTCT                                                                                      |
| BLD3  | <i>SNR52</i> forward                        | AAGAAAGAAAGAAAACCAGGAGTGAA                                                                                 |
| BLD4  | sgRNA reverse                               | ACAAATATTTAAACTCGGGACCTGG                                                                                  |
| BLD5  | <i>SNR52</i> NGG                            | GCGGCCGCAAGTGATTAGACT                                                                                      |
| BLD6  | sgRNA NGG                                   | GCAGCTCAGTGATTAAGAGTAAAGATGG                                                                               |
| BLD17 | <i>CDA2</i> FLP forward                     | CGGTTTAATAGTCATTTAATAAAAACCTCT<br>TGAAATTCTTATCAAATAAACTAATCATT<br>CTTCAATTACCATAAAGGGAACAAAAGCTGGG        |
| BLD18 | <i>CDA2</i> FLP reverse                     | CAACACTAAATTCTTCTTTGTAACCACCTA<br>CCTACCTACATACATACATACAATAACAAG<br>AATTTTTGTATTGATCTCTAGAACTAGTGGATCTG    |
| BLD19 | <i>DIT1 SNR52</i> reverse                   | GATGATTTACATGGAAAGGCCAAATTA<br>ATAAGTTTACGCAAGTC                                                           |
| BLD20 | <i>DIT1</i> sgRNA forward                   | GCCTTTCATGTAAATCATCGTTTTAGAGCT<br>AGAAATAGCAAGTTAAA                                                        |
| BLD23 | <i>DIT1</i> FLP forward                     | CGTTGAATTCAAATACAAGTAGTAATACCAC<br>GGTTGATACAGATTCGTTTGAACAAAAGCAACAA<br>CAAATATTGAAGCTAAAGGGAACAAAAGCTGGG |
| BLD24 | <i>DIT1</i> FLP reverse                     | CGTTTTCACTCTCGTCACAGTTGGCCACAACC<br>TATCGTCAGAAGAAGAAACAATAATCCAACGG<br>AACAAACCTCTAGAACTAGTGGATCTG        |
| BLD25 | <i>DIT1</i> upstream verification forward   | GGCTGCAATTTCCCAAAG                                                                                         |
| BLD26 | <i>DIT1</i> downstream verification reverse | GCCAGAGTAGCCAACAAGTTA                                                                                      |
| BLD27 | <i>CDA2</i> upstream verification           | TTCCGGTGGTAATTTTGTGAGA                                                                                     |

|       |                                                |                                                                                                       |
|-------|------------------------------------------------|-------------------------------------------------------------------------------------------------------|
|       | forward                                        |                                                                                                       |
| BLD29 | <i>DIT1</i> mid-gene verification<br>reverse   | GGTCCCATGATGATGACAGG                                                                                  |
| BLD30 | <i>CDA2</i> mid-gene verification<br>reverse   | TTTGTTGAGAGCATCCCACC                                                                                  |
| BLD31 | <i>CDA2</i> downstream verification<br>forward | GACTCGGTGCAATCTTGTC                                                                                   |
| BLD36 | <i>MUM3</i> sgRNA forward                      | GTAGTCCAAATATTTACTTCGTTTTAGAGCTA<br>GAAATAGCAAGTTAAA                                                  |
| BLD37 | <i>MUM3 SNR52</i> reverse                      | GAAGTAAATATTTGGACTACCAAATTAATA<br>TAGTTTACGCAAGTC                                                     |
| BLD38 | <i>MUM3</i> FLP forward                        | GGCGACACTACCGATGCCAATCCCGCTGTGGT<br>AGTAAGTAACCATGCATCTTTAGCGGACTGCTT<br>TGTTATTCTAAAGGGAACAAAAGCTGGG |
| BLD39 | <i>MUM3</i> FLP reverse                        | CTACCGGATTCAAAGAGATGAAAGTAGTAAAT<br>CAAGAATTTATAGTTTACCTATAGGTAGGATTC<br>AAGAGAACCTCTAGAACTAGTGGATCTG |
| BLD40 | <i>MUM3</i> upstream verification<br>forward   | CAGCATTTGAATAAGGTAAA                                                                                  |
| BLD41 | <i>MUM3</i> mid-gene verification<br>reverse   | TGTCCCTGTAACGTTGCTCC                                                                                  |
| BLD42 | <i>MUM3</i> downstream verification<br>reverse | GGGAGATAGGTTTACTGATC                                                                                  |
| BLD43 | <i>RRT8</i> sgRNA forward                      | GGTACGGAGTCGTTGCACTTGTTTTAGAGCTA<br>GAAATAGCAAGTTAAA                                                  |
| BLD44 | <i>RRT8 SNR52</i> reverse                      | AAGTGCAACGACTCCGTACCCAAATTAATA<br>AGTTTACGCAAGTC                                                      |



|       |                                             |                                                                                                     |
|-------|---------------------------------------------|-----------------------------------------------------------------------------------------------------|
| BLD45 | <i>RRT8</i> FLP forward                     | CCAATCTTCTAGACGTGGGCTAAAGGCACATGC<br>AAGATACTTTAAGTTGAAAGGGTTTCTGCGTAG<br>CGACTAAAGGGAACAAAAGCTGGG  |
| BLD46 | <i>RRT8</i> FLP reverse                     | GCAGGTTGGTTGTTGAGGTCTAAGTTTAGTAGCA<br>GCAATGAAGGTGGAGTTGCTGCTGGGTTTGGATG<br>TGCTCTAGA ACTAGTGGATCTG |
| BLD47 | <i>RRT8</i> upstream verification forward   | GTGGGCCCAATCATTGTCTTG                                                                               |
| BLD48 | <i>RRT8</i> mid-gene verification reverse   | TGATAAATGGGAACAGCTCG                                                                                |
| BLD49 | <i>RRT8</i> downstream verification reverse | CGGGTGAAATCTTGACCAAC                                                                                |
| BLD50 | <i>SRT1</i> sgRNA forward                   | TGGGAAAGAACCTCGTGTCCGTTTTAGAGCTA<br>GAAATAGCAAGTTAAA                                                |
| BLD51 | <i>SRT1</i> <i>SNR52</i> reverse            | GGACACGAGGTTCTTTCCCACAAATTA AAAATA<br>GTTTACGCAAGTC                                                 |
| BLD52 | <i>SRT1</i> FLP forward                     | CAAATAAGTTAACCAGAAAAGCAATACTTGTC<br>TTGTAAGTCGGAAAGCTTTTTACAAGATCATAGT<br>TCCAGTAAAGGGAACAAAAGCTGGG |
| BLD53 | <i>SRT1</i> FLP reverse                     | GAATCTATTCATGACA ACTTTGCATATTCTAGCTA<br>AAATACAAAATACAATCGTAAAGCAAGGCTCTAG<br>AACTAGTGGATCTG        |
| BLD54 | <i>SRT1</i> upstream verification forward   | GGATTAATTGTCGAGTGGCA                                                                                |
| BLD55 | <i>SRT1</i> mid-gene verification reverse   | GTAATACTGGTGAATAAC                                                                                  |
| BLD56 | <i>SRT1</i> downstream verification reverse | TAAATAACCAGGTAGACTTG                                                                                |
| BLD64 | <i>CHS3</i> sgRNA forward                   | AAGGTGGACGTGAAGTTTATGTTTTAGAGCTA<br>GAAATAGCAAGTTAAA                                                |

|       |                                             |                                                                                                       |
|-------|---------------------------------------------|-------------------------------------------------------------------------------------------------------|
| BLD65 | <i>CHS3 SNR52</i> reverse                   | ATAAACTTCACGTCCACCTTCAAATTA AAAAT<br>AGTTTACGCAAGTC                                                   |
| BLD66 | <i>CHS3</i> FLP forward                     | CCCTTGCATTAACACCAA AACTTATAGACAAC<br>AGAAACATTAGTCTTTTTTGT TTTCTACATTTAT<br>TCCTCTAAAGGGAACAAAAGCTGGG |
| BLD67 | <i>CHS3</i> FLP reverse                     | GTACAATGCATGCAATAAACAAGGCAGAAATT<br>TGAAATATTCTGGAGCCTCTATGTTATAAAGCA<br>GCGTTGCTCTAGA ACTAGTGGATCTG  |
| BLD68 | <i>CHS3</i> upstream verification forward   | GTTTTCAATTACAATTAATC                                                                                  |
| BLD69 | <i>CHS3</i> mid-gene verification reverse   | CATAATCGTTAATTT CATCG                                                                                 |
| BLD70 | <i>CHS3</i> downstream verification reverse | TTTGTGTTTGTAAGAGATTC                                                                                  |
| BLD71 | <i>CDA2</i> sgRNA forward                   | ATCCGATCCATTTATTATGGGTTTTAGAGCTAG<br>AAATAGCAAGTTAAA                                                  |
| BLD72 | <i>CDA2 SNR52</i> reverse                   | CCATAATAAATGGATCGGATCAAATTA AAAAATA<br>GTTTACGCAAGTC                                                  |
| BLD73 | <i>CDA2</i> verification reverse            | CATGAATTTAGATTGAAGTC                                                                                  |
| BLD74 | <i>DIT2</i> sgRNA forward                   | TTAGTGCTCATGGAGAATTGGTTTTAGAGCTA<br>GAAATAGCAAGTTAAA                                                  |
| BLD75 | <i>DIT2 SNR52</i> reverse                   | CAATTCTCCATGAGCACTAACAAATTA AAAAAT<br>AGTTTACGCAAGTC                                                  |
| BLD76 | <i>DIT2</i> FLP forward                     | GCACAGATAACCCTTTTGCTATTTGAGAACCAT<br>CCGGGTGATACTAGCCTTGCTCTTTCTCTTAAA<br>CAAGTAAAGGGAACAAAAGCTGGG    |
| BLD77 | <i>DIT2</i> FLP reverse                     | GTGAGTGTGGGGTGT TTTCTGTTAGCAAACGC<br>AAGTTATATACTATATGGTATGTACTGCATTCT<br>TCATTCTCTAGA ACTAGTGGATCTG  |
| BLD78 | <i>DIT2</i> upstream verification           | GACAATGAAATTTCCAAGACTCC                                                                               |

|        |                                                |                                                                  |
|--------|------------------------------------------------|------------------------------------------------------------------|
|        | forward                                        |                                                                  |
| BLD79  | <i>DIT2</i> mid-gene verification<br>reverse   | GGGCAACAACATCTCGGTATAG                                           |
| BLD80  | <i>DIT2</i> downstream verification<br>reverse | AAATGCTTAGCTTACAGGGG                                             |
| BLD97  | <i>Clp10_CHS3</i> forward                      | CGATACCGTCGACCTCGAGGACAGACAGAGA<br>GAGAGATCAGAGATTGAA            |
| BLD104 | <i>Clp10_CDA2</i> forward                      | CACTATAGGGCGAATTGGGTACCCGAAATTTA<br>AAGAGACAATTGAAAAAATTACAAGGAG |
| BLD105 | <i>Clp10_CDA2</i> reverse                      | GGGAACAAAAGCTGGGTACCTCATTTTGGGAA<br>AGTTTTAATATAATCAATACCACC     |
| BLD111 | <i>Clp10_CHS3</i> reverse                      | CAAAAGCTGGGTACCGGGCCCTCAACCAGACC<br>CCGAAGATGATCC                |
| BLD112 | <i>Clp10_MUM3</i> forward                      | CTTATCGATACCGTCGACCTCGAGATGGAATTC<br>ATTGAGCATTTAGGAGTCAAGC      |
| BLD113 | <i>Clp10_MUM3</i> reverse                      | CAAAAGCTGGGTACCGGGCCCCTACAGAGCTAC<br>AGAAAAATCATCTTGCAATATACG    |
| BLD116 | <i>Clp10_SRT1</i> forward                      | TACCGTCGACCTCGAGACAATTATAAATGTTTTTC<br>ATTAGTGTGGTAGTGTATCATATGC |
| BLD117 | <i>Clp10_SRT1</i> reverse                      | GGGAACAAAAGCTGGGTACCGGGCCCTTAAATA<br>ACTGATGTAGCAGGTGGAGGG       |
| BLD118 | <i>Clp10_SRT1</i> verification                 | GGACAATCTCTTGTTTTTACC                                            |
| BLD121 | <i>Clp10</i> first half forward                | CCCGGTACCCAGCTTTTGTTCCTTTAGTG                                    |
| BLD123 | <i>Clp10</i> second half reverse               | CTCGAGGTCGACGGTATCG                                              |
| BLD125 | <i>Clp10_RRT8</i> forward                      | CGATACCGTCGACCTCGAGATTGTTAATGGGA<br>CCACTAGGGGTG                 |
| BLD126 | <i>Clp10_RRT8</i> reverse                      | CAAAAGCTGGGTACCGGGCCCTCAGATGGTAT<br>TTGTAGCAGTCTTTGGG            |
| BLD142 | yEmRFP forward                                 | ATGGTTTCAAAGGTGAAGAAGATAATATGGC                                  |

|        |                                               |                                                                |
|--------|-----------------------------------------------|----------------------------------------------------------------|
| BLD143 | CIp10_ <i>CDA2</i> _yEmRFP reverse            | TCTTCACCTTTTGAAACCATTTTGGGAAAGTTT<br>TAATATAATCAATACCACCAACAC  |
| BLD144 | CIp10_ <i>MUM3</i> _yEmRFP reverse            | CTTCTTCACCTTTTGAAACCATCAGAGCTACAG<br>AAAATCATCTTGCAATATACG     |
| BLD145 | CIp10_ <i>RRT8</i> _yEmRFP reverse            | CTTCTTCACCTTTTGAAACCATGATGGTATTTGT<br>AGCAGTCTTTGGGG           |
| BLD146 | CIp10_ <i>SRT1</i> _yEmRFP reverse            | CTTCTTCACCTTTTGAAACCATAATAACTGATG<br>TAGCAGGTGGAGGG            |
| BLD148 | yEmRFP reverse                                | CGATACCGTCGACCTCGAGTTATTTATATAATTC<br>ATCCATACCACCAGTTGAATGTCT |
| BLD153 | CIp10_ <i>RRT8</i> _yEmRFP<br>verification    | TGTTACGACAAAAGGCTCAA                                           |
| BLD154 | CIp10_ <i>CDA2</i> _ <i>SAT1</i> verification | TACATTTATATAAAACCAGT                                           |
| BLD155 | CIp10_ <i>CDA2</i> _yEmRFP<br>verification    | GATGAAAATAATAAAGGTT                                            |
| BLD156 | CIp10_ <i>MUM3</i> _yEmRFP<br>verification    | ACCGGTAGATCTGTTGATCA                                           |
| BLD157 | CIp10_ <i>SRT1</i> _yEmRFP<br>verification    | GGAGTTATTATAGAACTATT                                           |
| OKZ67  | CIp10 first half reverse                      | GTATTCAACATTTCCGTGTCG                                          |
| OKZ68  | CIp10 second half<br>forward                  | CGACACGGAAATGTTGAATAC                                          |

658

659

660

661 Table 3. Plasmids used in this study

| Plasmid no. | Name                      | Key feature                                    | Reference  |
|-------------|---------------------------|------------------------------------------------|------------|
|             | pNAT                      | <i>P<sub>URA3</sub>URA3 SAT1</i>               | (46)       |
|             | pV1093                    | <i>CaCas9/SAT1 flipper ENO1</i>                | (59)       |
|             | CIp10-SAT                 | <i>CaRPS1 SAT1</i>                             | N. Dean    |
|             | yEpGAP_Cherry             | <i>URA3 yEmRFP</i>                             | (56)       |
| pLB1        | CIp10_ <i>CDA2</i>        | <i>CaRPS1 P<sub>CDA2</sub>CDA2 SAT1</i>        | This study |
| pLB2        | CIp10_ <i>CHS3</i>        | <i>CaRPS1 P<sub>CHS3</sub>CHS3 SAT1</i>        | This study |
| pLB3        | CIp10_ <i>MUM3</i>        | <i>CaRPS1 P<sub>MUM3</sub>MUM3 SAT1</i>        | This study |
| pLB4        | CIp10_ <i>RRT8</i>        | <i>CaRPS1 P<sub>RRT8</sub>RRT8 SAT1</i>        | This study |
| pLB5        | CIp10_ <i>SRT1</i>        | <i>CaRPS1 P<sub>SRT1</sub>SRT1 SAT1</i>        | This study |
| pLB6        | CIp10_ <i>CDA2_yEmRFP</i> | <i>CaRPS1 P<sub>CDA2</sub>CDA2 yEmRFP SAT1</i> | This study |
| pLB7        | CIp10_ <i>MUM3_yEmRFP</i> | <i>CaRPS1 P<sub>MUM3</sub>MUM3 yEmRFP SAT1</i> | This study |
| pLB8        | CIp10_ <i>RRT8_yEmRFP</i> | <i>CaRPS1 P<sub>RRT8</sub>RRT8 yEmRFP SAT1</i> | This study |
| pLB9        | CIp10_ <i>SRT1_yEmRFP</i> | <i>CaRPS1 P<sub>SRT1</sub>SRT1 yEmRFP SAT1</i> | This study |

662

663

664

665 **Figure Legends**

666 **Figure 1. Effect of different carbon sources on the chlamyospore formation.** A wild-type *C.*  
667 *dublinsiensis* strain (Cd1465) was spotted on synthetic agar medium containing the indicated  
668 carbon sources and were photographed on agar after 24 hours of growth. Gal - Galactose;  
669 GlcNAc – N-Acetylglucosamine; GlcN - Glucosamine. White arrows highlight examples of  
670 chlamyospores. Scale Bar = 50 nm.

671  
672 **Figure 2. Fluorescence analysis of the chlamyospore wall of *C. dublinsiensis*.** (A) WT  
673 (Cd1465), *dit1Δ* (BEM9), or *dit2Δ* (BEM10) were grown on SG medium to induce  
674 chlamyospores and then visualized by differential interference contrast (DIC) or fluorescence  
675 microscopy using a dityrosine filter set (Ex. 320nm Em. 410nm). (B) Chlamyospores of WT  
676 (Cd1465) and *cda2Δ* (BEM7) strains were stained with Eosin Y to visualize the chitosan layer  
677 and imaged using a GFP filter set. WT chlamyospores with no Eosin Y staining are shown as  
678 control. Arrowheads indicate examples of chlamyospores visible in the images. Scale bar =  
679 10μm.

680  
681 **Figure 3. Effect of mutations in *C. dublinsiensis* orthologs of *S. cerevisiae* spore wall genes on**  
682 **the chlamyospore wall.** (A) Cells of strains of the indicated genotype were grown on  
683 SGlycerol medium and then stained with both Eosin Y to label chitosan and Calcofluor White  
684 (CFW) to label chitin or chitosan. White arrowheads indicate examples of chlamyospores  
685 visible in the images. Yellow arrowheads indicate examples of CFW-stained septa. Scale bar =  
686 10μm. (B) The intensity of the Eosin Y fluorescence was categorized as bright, dim, or no  
687 fluorescence for each chlamyospore and the number of chlamyospores in each category for

688 each strain was quantified. For each strain, the value represents the average for one hundred  
689 chlamydospores in each of three independent experiments. Error bars indicate one standard  
690 deviation. One asterisk (\*) indicates significant difference at  $p < 0.05$ ; two asterisks (\*\*) indicates  
691 significant difference at  $p < 0.0005$  Student's *t*-test.

692

693 **Figure 4. Complementation of the chitosan defect by the wild-type alleles.** (A) A wild type  
694 copy of *CHS3*, *CDA2*, *MUM3*, or *SRT1* gene, respectively, was integrated into the corresponding  
695 deletion mutant (strains BEM15-18). Cells were grown on SGlycerol medium and Eosin Y  
696 staining of chlamydospores with or without reintroduction of the wild-type allele was  
697 examined. DIC = differential interference contrast. Scale bar = 10 $\mu$ m. (B) Rescue of Eosin Y  
698 staining by the wild-type alleles was quantified as in Figure 3.

699

700 **Figure 5. Electron microscopy of the chlamydospore wall of *C. dubliniensis*.** (A)  
701 Chlamydospores were induced and cells of different strains were stained with osmium-  
702 thiocarbohydrazide: WT (CD1465), *cda2* $\Delta$  (BEM7), *chs3* $\Delta$  (BEM8), *mum3* $\Delta$  (BEM11), *srt1* $\Delta$   
703 (BEM12), *rrt8* $\Delta$  (BEM13). For each strain, a pair of images is shown. The lower image is a  
704 higher magnification of the boxed region in upper image. Arrowheads indicate the inner cell  
705 wall layer. (B) Quantification of the thickness of the chitosan layer in each strain. Data  
706 represented are the means of measurements from 20 chlamydospores. The thickness of the  
707 chitosan layer was measured at 5 different positions on each chlamydospore. Error bars indicate  
708 one standard deviation. One asterisk (\*) indicates significant difference at  $p < 0.00005$ ; two  
709 asterisks (\*\*) indicates  $p < 5e-10$ , Student's *t*-test. Scale bar = 500 nm

710

711

712 **Figure 6. Lipid droplets in chlamyospores.** WT cells (CD1465) growing on SGlucose or  
713 SGlycerol media or the indicated mutant strains (BEM7, 8, 11, 13, 14) grown on SGlycerol were  
714 stained with MDH to label lipid droplets and visualized using a BFP filter. Scale bar = 10 $\mu$ m

715

716 **Figure 7. Localization of Cda2, Mum3, Rrt8 and Srt1 in chlamyospores.** WT (Cd1456) cells  
717 expressing no RFP fusion or strains expressing different *MUM3*-, *SRT1*-, or *RRT8*-y*EmRFP*  
718 fusions (BEM20, 21, 22) were grown on SGlycerol medium, stained with MDH and visualized  
719 through both BFP and RFP filters. Scale bar = 10 $\mu$ m ((B) Eosin Y staining of chlamyospores in  
720 WT (CD1465) *mum3* $\Delta$  *MUM3*-y*EMRFP* (BEM20) and *srt1* $\Delta$  *SRT1*-y*EmRFP* (BEM22) strains  
721 was quantified as in Figure 3.

722

723 **Figure 8. Model for organization of the *C. dubliniensis* chlamyospore and *S. cerevisiae***  
724 **ascospore walls.** The organization of the different layers of the walls are shown with respect to  
725 the cell plasma membrane. The linkages between components are based on the known linkages  
726 in the vegetative cell wall of *S. cerevisiae* (25). The nature of the crosslinks within and between  
727 the chitosan and dityrosine layers is unknown.

728

729

730

731

732

733

734



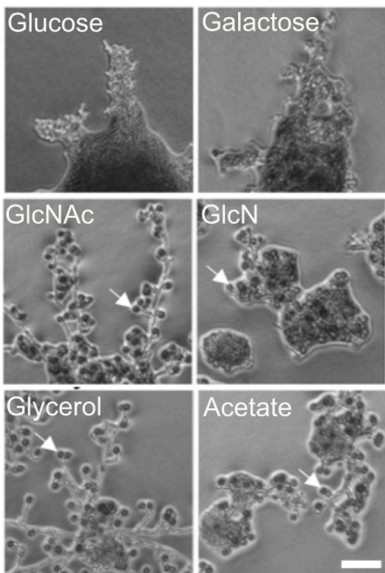

Figure 1

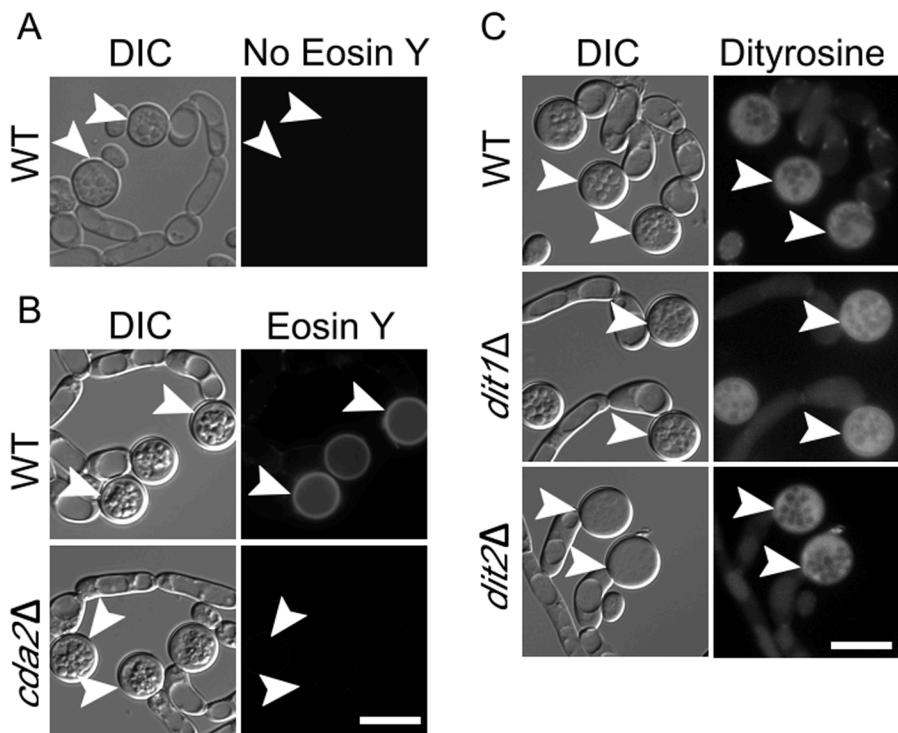

Figure 2

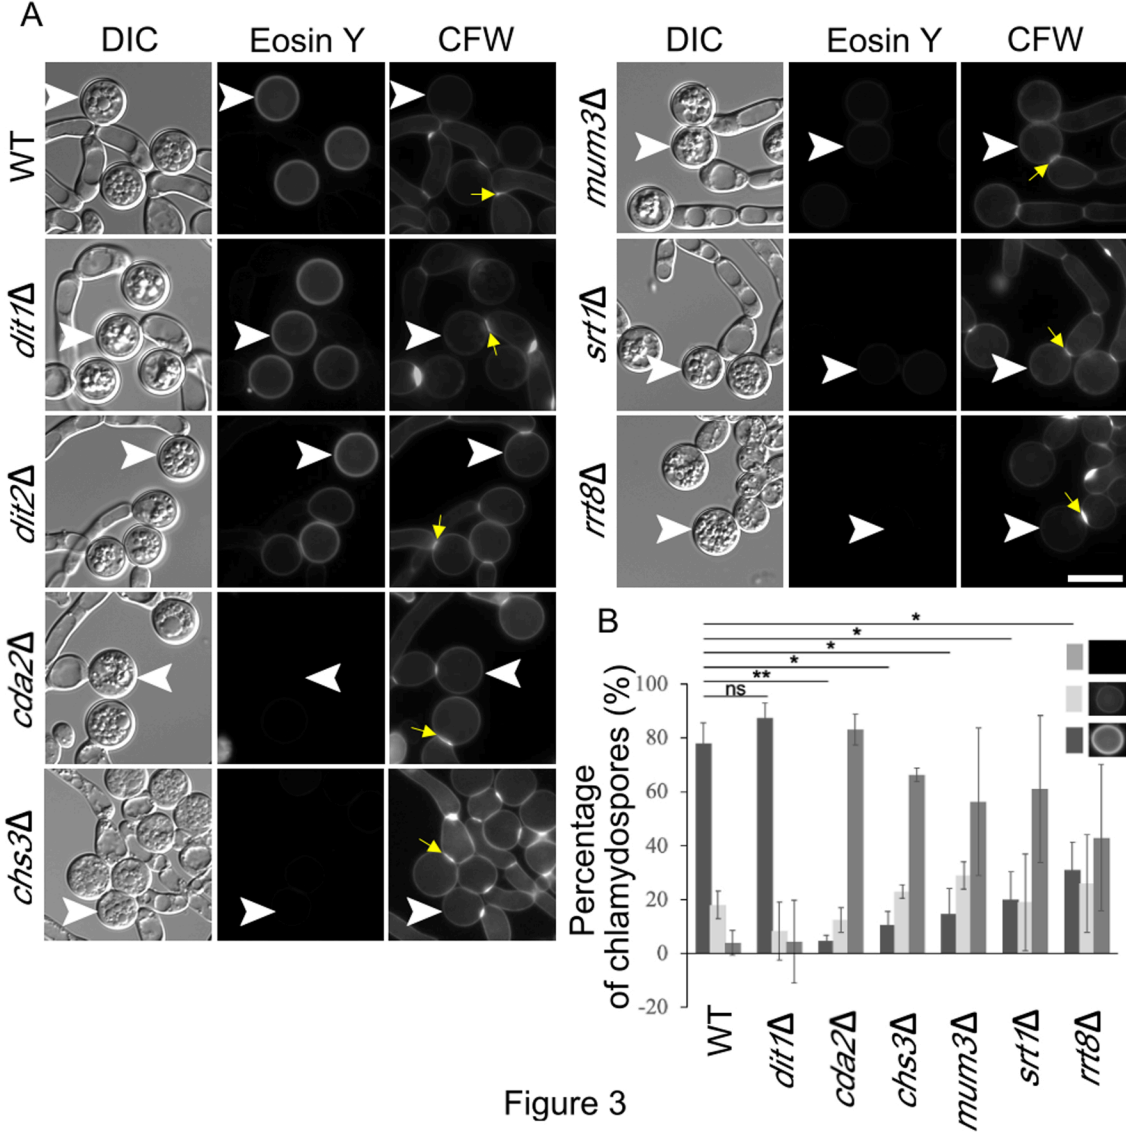

Figure 3

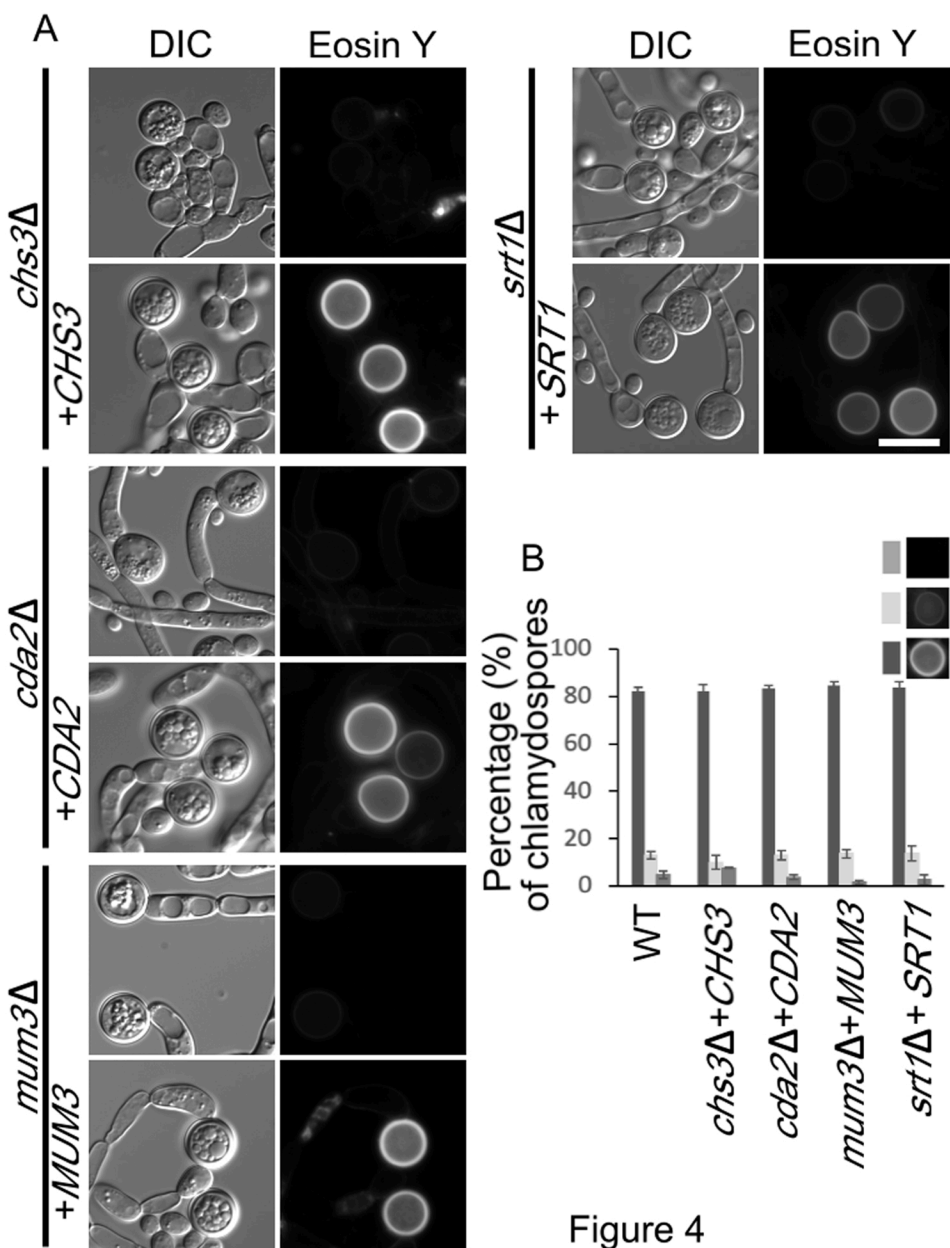

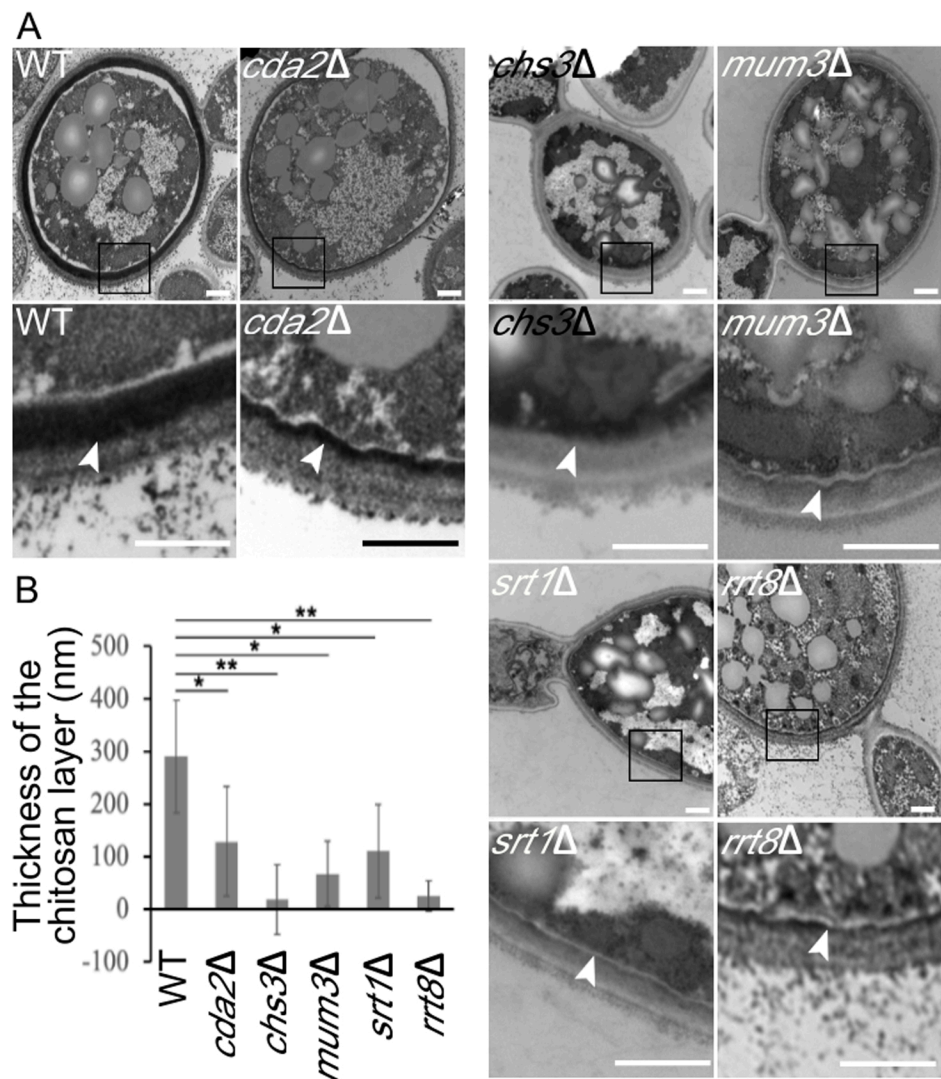

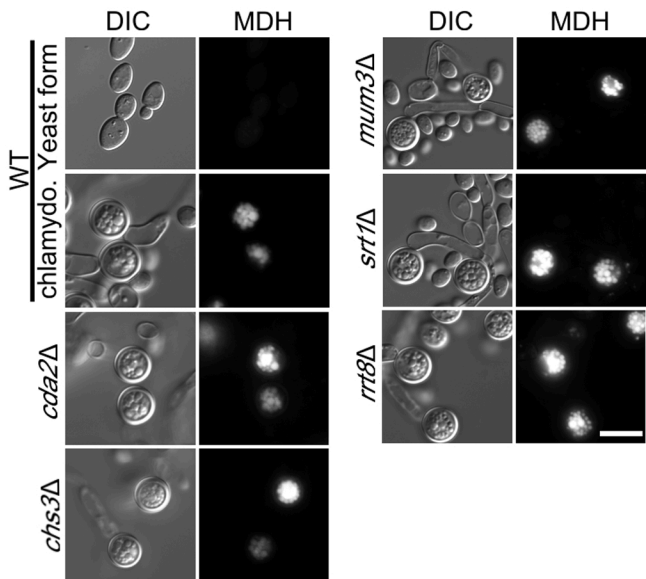

Figure 6

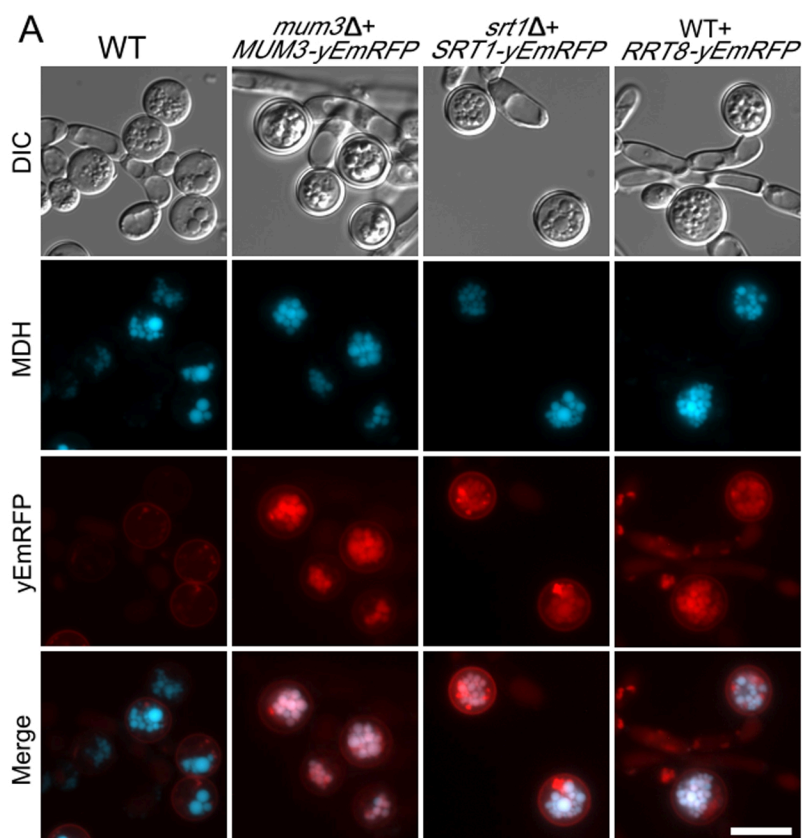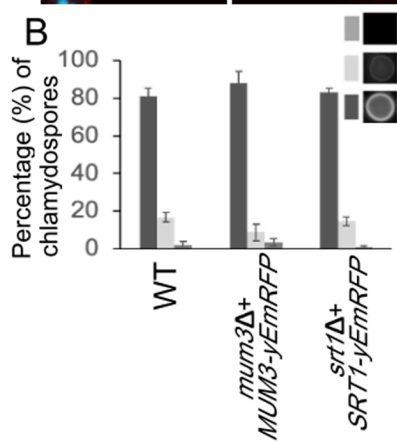

Figure 7

# Chlamydo-spore Wall

# Ascospore Wall

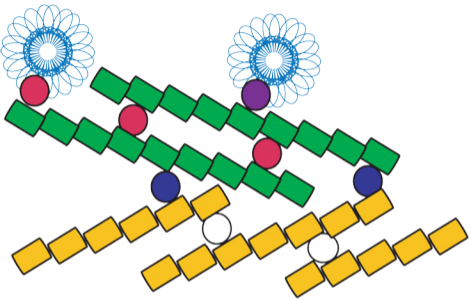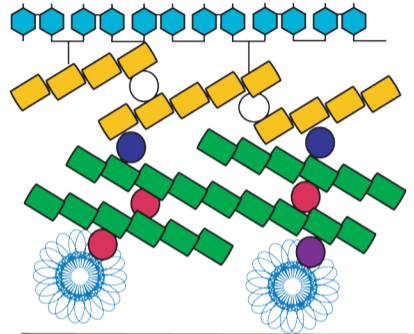

Plasma Membrane

Plasma Membrane

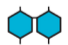

Dityrosine

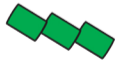

Beta-1,3-glucan

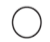

Undefined linkages

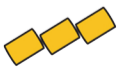

Chitosan

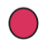

Beta-1,6-linkage

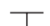

Beta-1,4-linkage

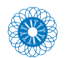

Mannan

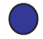

Alkali-sensitive linkage
